# Supplementary material for: Positive Outcomes of a Comprehensive Health Literacy Communication Training for Health Professionals in Three European Countries: A Multi-centre Pre-post Intervention Study
Source: Int J Environ Res Public Health. 2019 Oct 15;16(20):3923. doi: 10.3390/ijerph16203923 (PMC6843857; doi:10.3390/ijerph16203923)
Supplement: Supplementary file 1 [file ijerph-16-03923-s001.pdf]

## **Questionnaires 1-3 on Health literacy communication training**

### **Questionnaire 1.**

**Health Literacy Communication - before the training**

### **Questionnaire 2**

**Health Literacy Communication  
immediately following training**

### **Questionnaire 3.**

**Health Literacy Communication six weeks following training**

## Questionnaire 1.

### Health Literacy Communication - before the training

|                                         |  |
|-----------------------------------------|--|
| Fill in your unique participant number: |  |
|-----------------------------------------|--|

## Introduction

European research has found that nearly 50% of adults have limited health literacy. People with limited health literacy do not have the necessary skills to find, understand, or use information about health.

This training is designed to help health professionals to address problems with low health literacy in communication with patients. It is important for us to know how effective it is.

This questionnaire was therefore developed to study the quality of communication between health professionals and patients with limited health literacy. For the quality of the research we use different questionnaires. Because of this, some questions may look alike.

Please fill out this questionnaire three times: once before the start of the Health Literacy Communication Training, once immediately following the training, and once again six weeks after following the training. It takes about 15 minutes to answer the questions.

The questionnaire includes the following topics:

- A. General questions about you and your organisation
- B. Your knowledge of health literacy
- C. Health literacy focused communication Skills
- D. Attitude: Your opinion on using health literacy strategies
- E. Your confidence in communication focused on health literacy

## Questions

### A. General questions about you and your organisation

|                                                       |                                                                                                                |
|-------------------------------------------------------|----------------------------------------------------------------------------------------------------------------|
| 1. What is your age in years?                         | ..... years                                                                                                    |
| 2. What is your gender?                               | <input type="radio"/> Male<br><input type="radio"/> Female                                                     |
| 3. What country do you live in?                       | <input type="radio"/> Italy<br><input type="radio"/> Northern Ireland<br><input type="radio"/> The Netherlands |
| 4. What is the name of the organisation you work for? |                                                                                                                |

|                                                                                                                                                                                                                                                                                                                                                           |                                                                                                                                                                                                                                                                                                                                                                                                                                 |
|-----------------------------------------------------------------------------------------------------------------------------------------------------------------------------------------------------------------------------------------------------------------------------------------------------------------------------------------------------------|---------------------------------------------------------------------------------------------------------------------------------------------------------------------------------------------------------------------------------------------------------------------------------------------------------------------------------------------------------------------------------------------------------------------------------|
| 5. What is the highest level of completed education?                                                                                                                                                                                                                                                                                                      | <input type="radio"/> Grammar school<br><input type="radio"/> High school or equivalent<br><input type="radio"/> Vocational/technical school (2 year)<br><input type="radio"/> Some college<br><input type="radio"/> Bachelor's undergraduate degree<br><input type="radio"/> Master's postgraduate degree<br><input type="radio"/> Professional degree<br><input type="radio"/> Doctoral degree<br><input type="radio"/> Other |
| 6. What is your current position?                                                                                                                                                                                                                                                                                                                         |                                                                                                                                                                                                                                                                                                                                                                                                                                 |
| 7. How many years have you worked in this position?                                                                                                                                                                                                                                                                                                       | ..... years                                                                                                                                                                                                                                                                                                                                                                                                                     |
| 8. How often do you work with patients with low health literacy?                                                                                                                                                                                                                                                                                          | <input type="radio"/> 1 – Never<br><input type="radio"/> 2 – Rarely<br><input type="radio"/> 3 – Occasionally<br><input type="radio"/> 4 – Regularly<br><input type="radio"/> 5 – Very often                                                                                                                                                                                                                                    |
| 9. Have you previously received education or training on health literacy?                                                                                                                                                                                                                                                                                 | <input type="radio"/> 1 – Never<br><input type="radio"/> 2 – Rarely<br><input type="radio"/> 3 – Occasionally<br><input type="radio"/> 4 – Regularly<br><input type="radio"/> 5 – Very often                                                                                                                                                                                                                                    |
| 10. Have you previously received education or training in communication?                                                                                                                                                                                                                                                                                  | <input type="radio"/> 1 – Never<br><input type="radio"/> 2 – Rarely<br><input type="radio"/> 3 – Occasionally<br><input type="radio"/> 4 – Regularly<br><input type="radio"/> 5 – Very often                                                                                                                                                                                                                                    |
| <p><i>Learning objectives in relation to communication about health literacy can be different for each person, for example “provide clearer written information”, or “check frequently if patients understand information”.</i></p> <p>11. Can you indicate your learning objectives related to communicating with patients with low health literacy?</p> |                                                                                                                                                                                                                                                                                                                                                                                                                                 |

## B. Knowledge of health literacy

Please indicate how much you agree or disagree with the following questions:

| Questions                                                                        | 1<br>Strongly<br>disagree | 2<br>Disagree | 3<br>Some-<br>what<br>disagree | 4<br>Neither<br>agree<br>nor dis-<br>agree | 5<br>Some-<br>-what<br>agree | 6<br>Agree | 7<br>Strongly<br>agree |
|----------------------------------------------------------------------------------|---------------------------|---------------|--------------------------------|--------------------------------------------|------------------------------|------------|------------------------|
| 12. I understand what it means for patients to have low health literacy.         |                           |               |                                |                                            |                              |            |                        |
| 13. I know the prevalence of low health literacy.                                |                           |               |                                |                                            |                              |            |                        |
| 14. I know the groups that are more likely to be low health literate.            |                           |               |                                |                                            |                              |            |                        |
| 15. I understand the health outcomes associated with low health literacy.        |                           |               |                                |                                            |                              |            |                        |
| 16. I do a good job identifying low health literate patients.                    |                           |               |                                |                                            |                              |            |                        |
| 17. I am good at knowing whether or not my patients understand what I tell them. |                           |               |                                |                                            |                              |            |                        |

### C. Health Literacy focused Communication skills

Indicate how frequently you use each technique when working with patients;  
on a scale from Never (1) to Every time (7).

| <b>Gathering information</b>                                                                                                            | <b>1<br/>Never</b> | <b>2<br/>Rarely</b> | <b>3<br/>Occasio-<br/>nally</b> | <b>4<br/>Some-<br/>times</b> | <b>5<br/>Fre-<br/>quently</b> | <b>6<br/>Usually</b> | <b>7<br/>Every<br/>time</b> |
|-----------------------------------------------------------------------------------------------------------------------------------------|--------------------|---------------------|---------------------------------|------------------------------|-------------------------------|----------------------|-----------------------------|
| 18. Ask open questions                                                                                                                  |                    |                     |                                 |                              |                               |                      |                             |
| 19. Use active listening techniques to gather information                                                                               |                    |                     |                                 |                              |                               |                      |                             |
| 20. Observe cues related to non-verbal communication                                                                                    |                    |                     |                                 |                              |                               |                      |                             |
| 21. Create a shame-free environment                                                                                                     |                    |                     |                                 |                              |                               |                      |                             |
| <b>Providing information</b>                                                                                                            | <b>1<br/>Never</b> | <b>2<br/>Rarely</b> | <b>3<br/>Occasio-<br/>nally</b> | <b>4<br/>Some-<br/>times</b> | <b>5<br/>Fre-<br/>quently</b> | <b>6<br/>Usually</b> | <b>7<br/>Every<br/>time</b> |
| 22. Speaking slowly                                                                                                                     |                    |                     |                                 |                              |                               |                      |                             |
| 23. Using plain, non-medical language                                                                                                   |                    |                     |                                 |                              |                               |                      |                             |
| 24. Show or draw pictures                                                                                                               |                    |                     |                                 |                              |                               |                      |                             |
| 25. Limit the amount of information provided and repeat it                                                                              |                    |                     |                                 |                              |                               |                      |                             |
| 26. Use the teach-back or show-me techniques<br><i>(the patients explains the information in his own words to check understanding).</i> |                    |                     |                                 |                              |                               |                      |                             |

| <b>Shared decision making</b>                                                                                         | <b>1<br/>Never</b> | <b>2<br/>Rarely</b> | <b>3<br/>Occasio-<br/>nally</b> | <b>4<br/>Some-<br/>times</b> | <b>5<br/>Fre-<br/>quently</b> | <b>6<br/>Usually</b> | <b>7<br/>Every<br/>time</b> |
|-----------------------------------------------------------------------------------------------------------------------|--------------------|---------------------|---------------------------------|------------------------------|-------------------------------|----------------------|-----------------------------|
| 27. Convey awareness among patients that a choice exists in health care or treatment.                                 |                    |                     |                                 |                              |                               |                      |                             |
| 28. Inform patients about health care or treatment options in more detail.                                            |                    |                     |                                 |                              |                               |                      |                             |
| 29. Support patients to explore 'what matters most to them' after informing them on health care or treatment options. |                    |                     |                                 |                              |                               |                      |                             |
| 30. Train patients to participate in shared decision making.                                                          |                    |                     |                                 |                              |                               |                      |                             |
| <b>Enabling self-management</b>                                                                                       | <b>1<br/>Never</b> | <b>2<br/>Rarely</b> | <b>3<br/>Occasio-<br/>nally</b> | <b>4<br/>Some-<br/>times</b> | <b>5<br/>Fre-<br/>quently</b> | <b>6<br/>Usually</b> | <b>7<br/>Every<br/>time</b> |
| 31. Assess barriers and facilitators relating to treatment compliance.                                                |                    |                     |                                 |                              |                               |                      |                             |
| 32. Involve the patient in formulating personalized goals and action plans.                                           |                    |                     |                                 |                              |                               |                      |                             |
| 33. Train patients to perform adequate self-management behaviour.                                                     |                    |                     |                                 |                              |                               |                      |                             |

#### **D. Attitude: Your opinion on using health literacy strategies**

Health literacy strategies are defined as the communication and teaching strategies that have been described as effective with low health literacy patients. These include, plain language communication, which is the avoidance of medical jargon, and Teach-Back, which is a teaching strategy that has the patient teach back to the provider the information just presented to them and also include strategies related to shared decision making and promoting self-management. Please read each question and circle the answer that best reflects your opinion on the use of health literacy strategies in clinical practice. Choose only one answer.

| <b>Questions</b>                                                                                                                                 | <b>Scale</b>  |   |   |   |   |   |                |
|--------------------------------------------------------------------------------------------------------------------------------------------------|---------------|---|---|---|---|---|----------------|
| 34. My use of health literacy strategies with patients will result in patients having a better understanding of their illness and its treatment. | 1<br>Likely   | 2 | 3 | 4 | 5 | 6 | 7<br>Unlikely  |
| 35. Improved patient understanding will improve patient outcomes.                                                                                | 1<br>Agree    | 2 | 3 | 4 | 5 | 6 | 7<br>Disagree  |
| 36. Use of health literacy strategies with patients would help patients stay healthy.                                                            | 1<br>Agree    | 2 | 3 | 4 | 5 | 6 | 7<br>Disagree  |
| 37. My use of health literacy strategies with patients would be a...                                                                             | 1<br>Bad idea | 2 | 3 | 4 | 5 | 6 | 7<br>Good idea |

## E. Your confidence in health literacy focused communication

With respect to the following questions, please indicate your level of confidence in using your health literacy communication skills

| <b>How confident are you in your ability to:</b>                                                        | <b>1<br/>Not at all<br/>confident</b> | <b>2<br/>Slightly<br/>confident</b> | <b>3<br/>Neutral</b> | <b>4<br/>Moderately<br/>confident</b> | <b>5<br/>Very<br/>confident</b> |
|---------------------------------------------------------------------------------------------------------|---------------------------------------|-------------------------------------|----------------------|---------------------------------------|---------------------------------|
| 38. To communicate with patients who may have low health literacy                                       |                                       |                                     |                      |                                       |                                 |
| 39. Use instruments to identify patients with low health literacy                                       |                                       |                                     |                      |                                       |                                 |
| 40. Identify behaviours typically exhibited by people with low health literacy                          |                                       |                                     |                      |                                       |                                 |
| 41. Judge appropriateness of written health information for patients with low health literacy           |                                       |                                     |                      |                                       |                                 |
| 42. Gather information from patients with low health literacy                                           |                                       |                                     |                      |                                       |                                 |
| 43. Provide clear information to patients with low health literacy                                      |                                       |                                     |                      |                                       |                                 |
| 44. Use the teach back or show me technique to check understanding of patients with low health literacy |                                       |                                     |                      |                                       |                                 |
| 45. Create a shame free environment for patients with low health literacy                               |                                       |                                     |                      |                                       |                                 |
| 46. Involve patients with low health literacy in shared decision making                                 |                                       |                                     |                      |                                       |                                 |

|                                                                                      |  |  |  |  |  |
|--------------------------------------------------------------------------------------|--|--|--|--|--|
|                                                                                      |  |  |  |  |  |
| 47. Train patients with low health literacy to participate in shared decision making |  |  |  |  |  |
| 48. Promote self-management skills in patients with low health literacy              |  |  |  |  |  |

49. Do you have questions and/or comments?

**Thank you very much for your cooperation!**

## Questionnaire 2

### Health Literacy Communication

### immediately following training

|                                         |  |
|-----------------------------------------|--|
| Fill in your unique participant number: |  |
|-----------------------------------------|--|

### Introduction

European research has found that nearly 50% of adults have limited health literacy. People with limited health literacy do not have the necessary skills to find, understand, or use information about health.

This training is designed to help health professionals to address problems with low health literacy in communication with patients. It is important for us to know how effective it is.

This questionnaire was therefore developed to study the quality of communication between health professionals and patients with limited health literacy. For the quality of the research we use different questionnaires. Because of this, some questions may look alike.

Please fill out this questionnaire two times: once immediately following the training, and once again six weeks after following the training. It takes about 15 minutes to answer the questions.

The questionnaire includes the following topics:

- A. Your knowledge of health literacy
- B. Health literacy focused communication Skills
- C. Attitude: Your opinion on using health literacy strategies
- D. Your confidence in communication focused on health literacy
- E. Your evaluation of this training

## Questions

### A. Your knowledge of health literacy

Please indicate how much you agree or disagree with the following questions

| <b>Perceived knowledge</b>                                                      | <b>1</b><br><b>Strongly</b><br><b>disagree</b> | <b>2</b><br><b>Disagree</b> | <b>3</b><br><b>Some-</b><br><b>what</b><br><b>disagree</b> | <b>4</b><br><b>Neither</b><br><b>agree</b><br><b>nor dis-</b><br><b>agree</b> | <b>5</b><br><b>Some</b><br><b>-what</b><br><b>agree</b> | <b>6</b><br><b>Agree</b> | <b>7</b><br><b>Strongly</b><br><b>agree</b> |
|---------------------------------------------------------------------------------|------------------------------------------------|-----------------------------|------------------------------------------------------------|-------------------------------------------------------------------------------|---------------------------------------------------------|--------------------------|---------------------------------------------|
| 1. I understand what it means for patients to have low health literacy          |                                                |                             |                                                            |                                                                               |                                                         |                          |                                             |
| 2. I know the prevalence of low health literacy                                 |                                                |                             |                                                            |                                                                               |                                                         |                          |                                             |
| 3. I know the groups that are more likely to be low health literate             |                                                |                             |                                                            |                                                                               |                                                         |                          |                                             |
| 4. I understand the health outcomes associated with low health literacy         |                                                |                             |                                                            |                                                                               |                                                         |                          |                                             |
| 5. I do a good job identifying low health literate patients.                    |                                                |                             |                                                            |                                                                               |                                                         |                          |                                             |
| 6. I am good at knowing whether or not my patients understand what I tell them. |                                                |                             |                                                            |                                                                               |                                                         |                          |                                             |

## B. Health Literacy focused Communication skills

Indicate how frequently you use each technique when working with patients, from Never (1) to Every time (7).

| <b>Gathering information</b>                                                                                                            | <b>1<br/>Never</b> | <b>2<br/>Rarely</b> | <b>3<br/>Occasio-<br/>nally</b> | <b>4<br/>Some-<br/>times</b> | <b>5<br/>Fre-<br/>quently</b> | <b>6<br/>Usually</b> | <b>7<br/>Every<br/>time</b> |
|-----------------------------------------------------------------------------------------------------------------------------------------|--------------------|---------------------|---------------------------------|------------------------------|-------------------------------|----------------------|-----------------------------|
| 7. ask open questions                                                                                                                   |                    |                     |                                 |                              |                               |                      |                             |
| 8. use active listening techniques to gather information?                                                                               |                    |                     |                                 |                              |                               |                      |                             |
| 9. Observe cues related to non-verbal communication                                                                                     |                    |                     |                                 |                              |                               |                      |                             |
| 10. Create a shame-free environment                                                                                                     |                    |                     |                                 |                              |                               |                      |                             |
| <b>Providing information</b>                                                                                                            | <b>1<br/>Never</b> | <b>2<br/>Rarely</b> | <b>3<br/>Occasio-<br/>nally</b> | <b>4<br/>Some-<br/>times</b> | <b>5<br/>Fre-<br/>quently</b> | <b>6<br/>Usually</b> | <b>7<br/>Every<br/>time</b> |
| 11. Speaking slowly                                                                                                                     |                    |                     |                                 |                              |                               |                      |                             |
| 12. Using plain, non-medical language                                                                                                   |                    |                     |                                 |                              |                               |                      |                             |
| 13. Show or draw pictures                                                                                                               |                    |                     |                                 |                              |                               |                      |                             |
| 14. Limit the amount of information provided and repeat it                                                                              |                    |                     |                                 |                              |                               |                      |                             |
| 15. Use the teach-back or show-me techniques<br><i>(the patients explains the information in his own words to check understanding).</i> |                    |                     |                                 |                              |                               |                      |                             |
| <b>Shared decision making</b>                                                                                                           | <b>1<br/>Never</b> | <b>2<br/>Rarely</b> | <b>3<br/>Occasio-<br/>nally</b> | <b>4<br/>Some-<br/>times</b> | <b>5<br/>Fre-<br/>quently</b> | <b>6<br/>Usually</b> | <b>7<br/>Every<br/>time</b> |
| 16. Make patients aware that they have a choice in health care or treatment.                                                            |                    |                     |                                 |                              |                               |                      |                             |
| 17. Inform patients about health care or treatment options in more detail.                                                              |                    |                     |                                 |                              |                               |                      |                             |

|                                                                                                                  |                    |                     |                                 |                              |                               |                      |                             |
|------------------------------------------------------------------------------------------------------------------|--------------------|---------------------|---------------------------------|------------------------------|-------------------------------|----------------------|-----------------------------|
| 18. Support patients to explore 'what matters most to them' after informing on health care or treatment options. |                    |                     |                                 |                              |                               |                      |                             |
| 19. Train patients to participate in shared decision making.                                                     |                    |                     |                                 |                              |                               |                      |                             |
| <b>Enabling self-management</b>                                                                                  | <b>1<br/>Never</b> | <b>2<br/>Rarely</b> | <b>3<br/>Occasio-<br/>nally</b> | <b>4<br/>Some-<br/>times</b> | <b>5<br/>Fre-<br/>quently</b> | <b>6<br/>Usually</b> | <b>7<br/>Every<br/>time</b> |
| 20. Assess barriers and facilitators relating to treatment compliance.                                           |                    |                     |                                 |                              |                               |                      |                             |
| 21. Involve the patient in formulating personalized personalised goals and action plans.                         |                    |                     |                                 |                              |                               |                      |                             |
| 22. Train patients to perform adequate self-management behaviour.                                                |                    |                     |                                 |                              |                               |                      |                             |

### c. Attitude: Your opinion on using health literacy strategies

Health literacy strategies are defined as the communication and teaching strategies that have been described as effective with low health literacy patients. These include, plain language communication, which is the avoidance of medical jargon, and Teach-Back, which is a teaching strategy that has the patient teach back to the provider the information just presented to them and also include strategies related to shared decision making and promoting self-management. Please read each question and circle the answer that best reflects your opinion on the use of health literacy strategies in clinical practice. Choose only one answer.

| Questions                                                                                                                                        | Scale         |   |   |   |   |   |                |
|--------------------------------------------------------------------------------------------------------------------------------------------------|---------------|---|---|---|---|---|----------------|
| 23. My use of health literacy strategies with patients will result in patients having a better understanding of their illness and its treatment. | 1<br>Likely   | 2 | 3 | 4 | 5 | 6 | 7<br>Unlikely  |
| 24. Improved patient understanding will improve patient outcomes.                                                                                | 1<br>Agree    | 2 | 3 | 4 | 5 | 6 | 7<br>Disagree  |
| 25. Use of health literacy strategies with patients would help patients stay healthy.                                                            | 1<br>Agree    | 2 | 3 | 4 | 5 | 6 | 7<br>Disagree  |
| 26. My use of health literacy strategies with patients would be a...                                                                             | 1<br>Bad idea | 2 | 3 | 4 | 5 | 6 | 7<br>Good idea |

### D. Your confidence in health literacy focused communication

With respect to the following questions, please indicate your level of confidence in using your health literacy communication skills

| How confident are you in your ability to:                                                               | 1<br>Not at all confident | 2<br>Slightly confident | 3<br>Neutral | 4<br>Moderately confident | 5<br>Very confident |
|---------------------------------------------------------------------------------------------------------|---------------------------|-------------------------|--------------|---------------------------|---------------------|
| 27. To communicate with patients who may have low health literacy                                       |                           |                         |              |                           |                     |
| 28. Use instruments to identify patients with low health literacy                                       |                           |                         |              |                           |                     |
| 29. Identify behaviours typically exhibited by people with low health literacy                          |                           |                         |              |                           |                     |
| 30. Judge appropriateness of written health information for patients with low health literacy           |                           |                         |              |                           |                     |
| 31. Gather information from patients with low health literacy                                           |                           |                         |              |                           |                     |
| 32. Provide clear information to patients with low health literacy                                      |                           |                         |              |                           |                     |
| 33. Use the teach back or show me technique to check understanding of patients with low health literacy |                           |                         |              |                           |                     |
| 34. Create a shame free environment for patients with low health literacy                               |                           |                         |              |                           |                     |

|                                                                                      |  |  |  |  |  |
|--------------------------------------------------------------------------------------|--|--|--|--|--|
| 35. Involve patients with low health literacy in shared decision making              |  |  |  |  |  |
| 36. Train patients with low health literacy to participate in shared decision making |  |  |  |  |  |
| 37. Promote self-management skills in patients with low health literacy              |  |  |  |  |  |

### E. Your evaluation of this training.

For each question indicate which answer applies best to you by ticking the appropriate boxes.

|                                                                                                  |                 |           |                   |
|--------------------------------------------------------------------------------------------------|-----------------|-----------|-------------------|
| 38. Did you have a clear picture of the topics and objectives before the start of this training? | Yes             | Partially | No                |
| 39. What was the balance between theory and practice (exercises, roleplays, assignments)?        | Too much theory | Good      | Too much practice |
| 40. Were you sufficiently challenged by the trainer to participate actively?                     | Yes             | Sometimes | No                |
| 41. Did the facilitator sufficiently relate back to your practice experience?                    | Yes             | Sometimes | No                |
| 42. How difficult were the meetings?                                                             | Difficult       | Good      | Easy              |
| 43. Do you think you can use the contents of this training in your work?                         | Yes             | Partially | No                |
| 44. How do you rate the length of this training?                                                 | Too long        | Good      | Too short         |
| 45. How do you rate the group size of this training?                                             | Too large       | Good      | Too small         |
| 46. Did your supervisor pay attention to this training?                                          | Yes             | A little  | No                |
| 47. Have the objectives of this training been achieved according to you?                         | Yes             | Partially | No                |

|                                                           |     |           |    |
|-----------------------------------------------------------|-----|-----------|----|
| 48. Would you recommend this training to your colleagues? | Yes | Partially | No |
|-----------------------------------------------------------|-----|-----------|----|

Please indicate how much you agree or disagree with the following questions

| Questions                                                                                      | 1<br>Strongly<br>disagree | 2<br>Dis-<br>agree | 3<br>Some-<br>what<br>disagree | 4<br>Neither<br>agree<br>nor<br>disagree | 5<br>Some-<br>what<br>agree | 6<br>Agree | 7<br>Strongly<br>agree |
|------------------------------------------------------------------------------------------------|---------------------------|--------------------|--------------------------------|------------------------------------------|-----------------------------|------------|------------------------|
| 49. The training was appropriate for my educational level and working experience.              |                           |                    |                                |                                          |                             |            |                        |
| 50. The training increased my knowledge about health literacy                                  |                           |                    |                                |                                          |                             |            |                        |
| 51. The training increased my comfort in communicating with patients with low health literacy. |                           |                    |                                |                                          |                             |            |                        |
| 52. I found the roleplay descriptions to be realistic.                                         |                           |                    |                                |                                          |                             |            |                        |
| 53. I found practicing with a standardized patient useful.                                     |                           |                    |                                |                                          |                             |            |                        |
| 54. I found the feedback following my roleplay conversations useful.                           |                           |                    |                                |                                          |                             |            |                        |
| 55. I will use the suggested communication strategies in my practice                           |                           |                    |                                |                                          |                             |            |                        |

56. What did you learn in this training related to health literacy focused communication?

57. With which number from 1-10 would you rate the trainers?

|                                                                       |
|-----------------------------------------------------------------------|
| Trainer 1<br>Trainer 2                                                |
| 58. With which number from 1-10 would you rate the training in total? |
| Do you have any advice or suggestions related to this training?       |

**Thank you very much for your cooperation!**

### Questionnaire 3.

#### Health Literacy Communication six weeks following training

|                                         |  |
|-----------------------------------------|--|
| Fill in your unique participant number: |  |
|-----------------------------------------|--|

#### Introduction

European research has found that nearly 50% of adults have limited health literacy. People with limited health literacy do not have the necessary skills to find, understand, or use information about health.

This questionnaire was therefore developed to study the quality of communication between health professionals and patients with limited health literacy after the training for health professionals. For the quality of the research we use different questionnaires. Because of this, some questions may look alike.

Please fill out this questionnaire once again six weeks after following the training. It takes about 15 minutes to answer the questions.

The questionnaire includes the following topics:

- A. Your knowledge of health literacy
- B. Health literacy focused communication Skills
- C. Your confidence in communication focused on health literacy

## Questions

### A. Your knowledge of health literacy

Please indicate how much you agree or disagree with the following questions:

|                                                                                 | 1<br>Strongly<br>disagree | 2<br>Dis-<br>agree | 3<br>Some-<br>what<br>disagree | 4<br>Neither<br>agree<br>nor<br>disagree | 5<br>Some-<br>what<br>agree | 6<br>Agree | 7<br>Strongly<br>agree |
|---------------------------------------------------------------------------------|---------------------------|--------------------|--------------------------------|------------------------------------------|-----------------------------|------------|------------------------|
| 1. I understand what it means for patients to have low health literacy          |                           |                    |                                |                                          |                             |            |                        |
| 2. I know the prevalence of low health literacy                                 |                           |                    |                                |                                          |                             |            |                        |
| 3. I know the groups that are more likely to be low health literate             |                           |                    |                                |                                          |                             |            |                        |
| 4. I understand the health outcomes associated with low health literacy         |                           |                    |                                |                                          |                             |            |                        |
| 5. I do a good job identifying low health literate patients.                    |                           |                    |                                |                                          |                             |            |                        |
| 6. I am good at knowing whether or not my patients understand what I tell them. |                           |                    |                                |                                          |                             |            |                        |

## B. Health Literacy focused Communication skills

Indicate how frequently you use each technique when working with patients;  
from Never (1) to Every time (7);

| <b>Gathering information</b>                                                                                                            | <b>1<br/>Never</b> | <b>2<br/>Rarely</b> | <b>3<br/>Occasio-<br/>nally</b> | <b>4<br/>Some-<br/>times</b> | <b>5<br/>Fre-<br/>quently</b> | <b>6<br/>Usually</b> | <b>7<br/>Every<br/>time</b> |
|-----------------------------------------------------------------------------------------------------------------------------------------|--------------------|---------------------|---------------------------------|------------------------------|-------------------------------|----------------------|-----------------------------|
| 7. ask open questions                                                                                                                   |                    |                     |                                 |                              |                               |                      |                             |
| 8. use active listening techniques to gather information                                                                                |                    |                     |                                 |                              |                               |                      |                             |
| 9. Observe cues related to non-verbal communication                                                                                     |                    |                     |                                 |                              |                               |                      |                             |
| 10. Create a shame-free environment                                                                                                     |                    |                     |                                 |                              |                               |                      |                             |
| <b>Providing information</b>                                                                                                            | <b>1<br/>Never</b> | <b>2<br/>Rarely</b> | <b>3<br/>Occasio-<br/>nally</b> | <b>4<br/>Some-<br/>times</b> | <b>5<br/>Fre-<br/>quently</b> | <b>6<br/>Usually</b> | <b>7<br/>Every<br/>time</b> |
| 11. Speaking slowly                                                                                                                     |                    |                     |                                 |                              |                               |                      |                             |
| 12. Using plain, non-medical language                                                                                                   |                    |                     |                                 |                              |                               |                      |                             |
| 13. Show or draw pictures                                                                                                               |                    |                     |                                 |                              |                               |                      |                             |
| 14. Limit the amount of information provided and repeat it                                                                              |                    |                     |                                 |                              |                               |                      |                             |
| 15. Use the teach-back or show-me techniques<br><i>(the patients explains the information in his own words to check understanding).</i> |                    |                     |                                 |                              |                               |                      |                             |

| <b>Shared decision making</b>                                                                                         | <b>1<br/>Never</b> | <b>2<br/>Rarely</b> | <b>3<br/>Occasio-<br/>nally</b> | <b>4<br/>Some-<br/>times</b> | <b>5<br/>Fre-<br/>quently</b> | <b>6<br/>Usually</b> | <b>7<br/>Every<br/>time</b> |
|-----------------------------------------------------------------------------------------------------------------------|--------------------|---------------------|---------------------------------|------------------------------|-------------------------------|----------------------|-----------------------------|
| 16. Convey awareness among patients that a choice exists in health care or treatment.                                 |                    |                     |                                 |                              |                               |                      |                             |
| 17. Inform patients about health care or treatment options in more detail.                                            |                    |                     |                                 |                              |                               |                      |                             |
| 18. Support patients to explore 'what matters most to them' after informing them on health care or treatment options. |                    |                     |                                 |                              |                               |                      |                             |
| 19. Train patients to participate in shared decision making.                                                          |                    |                     |                                 |                              |                               |                      |                             |
| <b>Enabling self-management</b>                                                                                       | <b>1<br/>Never</b> | <b>2<br/>Rarely</b> | <b>3<br/>Occasio-<br/>nally</b> | <b>4<br/>Some-<br/>times</b> | <b>5<br/>Fre-<br/>quently</b> | <b>6<br/>Usually</b> | <b>7<br/>Every<br/>time</b> |
| 20. Assess barriers and facilitators relating to treatment compliance.                                                |                    |                     |                                 |                              |                               |                      |                             |
| 21. Involve the patient in formulating personalized goals and action plans.                                           |                    |                     |                                 |                              |                               |                      |                             |
| 22. Train patients to perform adequate self-management behaviour.                                                     |                    |                     |                                 |                              |                               |                      |                             |

### C. Your confidence in health literacy focused communication

With respect to the following questions, please indicate your level of confidence in using your health literacy communication skills

| How confident are you in your ability to:                                                               | 1<br>Not at all confident | 2<br>Slightly confident | 3<br>Neutral | 4<br>Moderately confident | 5<br>Very confident |
|---------------------------------------------------------------------------------------------------------|---------------------------|-------------------------|--------------|---------------------------|---------------------|
| 23. To communicate with patients who may have low health literacy                                       |                           |                         |              |                           |                     |
| 24. Use instruments to identify patients with low health literacy                                       |                           |                         |              |                           |                     |
| 25. Identify behaviours typically exhibited by people with low health literacy                          |                           |                         |              |                           |                     |
| 26. Judge appropriateness of written health information for patients with low health literacy           |                           |                         |              |                           |                     |
| 27. Gather information from patients with low health literacy                                           |                           |                         |              |                           |                     |
| 28. Provide clear information to patients with low health literacy                                      |                           |                         |              |                           |                     |
| 29. Use the teach back or show me technique to check understanding of patients with low health literacy |                           |                         |              |                           |                     |
| 30. Create a shame free environment for patients with low health literacy                               |                           |                         |              |                           |                     |

|                                                                                      |  |  |  |  |  |
|--------------------------------------------------------------------------------------|--|--|--|--|--|
| 31. Involve patients with low health literacy in shared decision making              |  |  |  |  |  |
| 32. Train patients with low health literacy to participate in shared decision making |  |  |  |  |  |
| 33. Promote self-management skills in patients with low health literacy              |  |  |  |  |  |

Do you have questions and/or comments?

**Thank you very much for your cooperation!**
